Anesthesiology

1998; 88:1144-53

© 1998 American Society of Anesthesiologists, Inc.

Lippincott-Raven Publishers

## Exposure to Environmental Tobacco Smoke and the Risk of Adverse Respiratory Events in Children Receiving General Anesthesia

Eric T. Skolnick, M.D.,\* Maria A. Vomvolakis, M.S.,† Karen A. Buck, M.S.,‡ Salvatore F. Mannino, M.A.,§  
Lena S. Sun, M.D.||

**Background:** Exposure to environmental tobacco smoke is associated with detrimental effects on pulmonary function in children. The authors investigated the relation between airway

complications in children receiving general anesthesia and the passive inhalation of tobacco smoke.

**Methods:** Six hundred two children scheduled to receive general anesthesia were enrolled in this prospective study. The anesthesiologist and the recovery room nurse, unaware of the smoke exposure history, recorded the occurrence of airway complications. A history of passive smoking was assessed by measuring the urinary concentration of the major nicotine metabolite cotinine and by questionnaire.

**Results:** Airway complications occurred in 42% of the patients with urinary concentrations of cotinine  $\geq 40$  ng/ml, in 33% of the patients with concentrations of cotinine between 10.0 and 39.9 ng/ml, and in 24% of the patients with concentrations of cotinine  $< 10$  ng/ml ( $P = 0.01$  for the trend among the three groups). The gender of the child ( $P = 0.001$ ) and the educational level of the child's mother ( $P = 0.0008$ ) significantly modified the effect of the concentration of cotinine on the incidence of adverse respiratory events.

**Conclusions:** There is a strong association between passive inhalation of tobacco smoke and airway complications in children receiving general anesthesia. The relationship is greatest for girls and for those whose mothers have a lower level of education. Passive smoking should be regarded as a risk factor in children undergoing general anesthesia. (Key words: Anesthetic complications; passive smoking; pediatric anesthesia; tobacco smoke pollution.)

This article is accompanied by an Editorial View. Please see: Koop CE: Adverse anesthesia events in children exposed to environmental tobacco smoke. *ANESTHESIOLOGY* 1998; 88: 1141-2.

\* Assistant Professor of Anesthesiology and Pediatrics, Department of Anesthesiology, Columbia University College of Physicians and Surgeons and The Babies and Children's Hospital of New York.

† Research Assistant, Department of Anesthesiology, Columbia University College of Physicians and Surgeons and The Babies and Children's Hospital of New York.

‡ Pre-Doctoral Fellow in Epidemiology, Columbia University School of Public Health.

§ Student, University of Medicine and Dentistry of New Jersey.

|| Associate Professor of Anesthesiology and Pediatrics, Columbia University College of Physicians and Surgeons and The Babies and Children's Hospital of New York.

Received from the Departments of Anesthesiology and Pediatrics, The Babies and Children's Hospital of New York; Columbia University College of Physicians and Surgeons; and the Division of Epidemiology, Columbia University School of Public Health, New York, New York. Submitted for publication April 30, 1997. Accepted for publication November 12, 1997. Supported by a grant from the Office of Clinical Trials, Columbia-Presbyterian Medical Center, New York, New York. Presented in part at the International Anesthesia Research Society 69th Clinical and Scientific Congress, Honolulu, Hawaii, March 10-14, 1995.

Address reprint requests to Dr. Skolnick: Division of Pediatric Anesthesia and Intensive Care, BH4-440N, Columbia-Presbyterian Medical Center, 622 West 168th Street, New York, New York 10032. Address electronic mail to: ETS1@columbia.edu

U. S. Environmental Protection Agency: Respiratory health effects of passive smoking: Lung cancer and other disorders [EPA/600/8-90/006F]. Washington, DC, US Environmental Protection Agency, Office of Research and Development, Office of Air and Radiation, December 1992

EXPOSURE to environmental tobacco smoke is associated with several detrimental effects on the respiratory system in children. Passive smoking results in decreased lung growth. The expected increase in the forced expiratory volume in 1 s and in the forced vital capacity during childhood is diminished.<sup>1-3</sup> Passive inhalation of tobacco smoke by children has been associated with an increased incidence and severity of asthma and airway hyperreactivity<sup>4-8</sup> and an increased rate of lower respiratory tract illness in infants.<sup>9,10</sup> Second-hand smoking has also been linked with upper airway cellular and mucociliary dysfunction including higher rates of otitis media.<sup>11,12</sup>

Cotinine, the major metabolite of nicotine, is the most commonly used qualitative and quantitative bio-



## TOBACCO SMOKE IN ANESTHETIZED CHILDREN

logic marker of exposure to environmental tobacco smoke.<sup>4,9,13-16</sup> The correlation between passive smoking and urinary concentrations of cotinine has been clearly established. This allows for group delineation according to low, moderate, and high levels of passive smoking.<sup>4,14-16</sup> Because cotinine in urine has a half-life of 19-40 h in nonsmokers, the reported values reflect exposure during the previous 3-4 days.<sup>14</sup>

In the United States, nearly two million surgical procedures per year are performed on children younger than 15 yr old,\*\* so accurate identification of a patient population at increased risk for perioperative airway complications is important. Although the adverse effects of passive smoking have been reported previously,<sup>1-13</sup> the effect of exposure to passive smoke on perioperative airway complications in children after the administration of general anesthesia is unknown. Accordingly, we conducted a prospective study using urine concentrations of cotinine to test the hypothesis that exposure to environmental tobacco smoke increases the incidence of airway complications in children undergoing general anesthesia.

## Materials and Methods

### Patients

After approval from the institutional review board of Health Sciences, Columbia University, and with written informed consent from the parents, 602 children (age range, 1 month-12 <fr11/12> yr) coming from home on the day of surgery and scheduled to receive general anesthesia at The Babies and Children's Hospital of New York/Columbia Presbyterian Medical Center between September 1993 and January 1995 were enrolled. All study participants were free of cardiovascular or severe respiratory disease and were classified as American Society of Anesthesiologists patient status I-III. Twenty-seven of the 602 patients were excluded because they inadvertently received drugs that were not part of the anesthetic protocol (see later). Urine samples for cotinine analysis were obtained successfully from 499 of the 575 remaining children. After the study was completed,

three environmental tobacco smoke exposure groups were defined: those with corrected (see later) urinary concentrations of cotinine of (1) <10 ng/ml (no exposure), (2) 10.0-39.9 ng/ml (moderate exposure), and (3)  $\geq 40$  ng/ml (heavy exposure).<sup>4,14-16</sup>

### Documentation of Environmental Tobacco Smoke Exposure

On the day of surgery, parents completed an American Thoracic Society children's respiratory questionnaire,<sup>17</sup> which furnished demographic and medical information on the child and family and a history of environmental exposure. The questionnaire was modified by including (1) a detailed smoking survey from the adult portion of the respiratory questionnaire and (2) qualitative and quantitative assessments of tobacco use by all persons, at home and at other places frequented by the child.

A patient was considered to have a history of reactive airways disease if the parents gave an affirmative answer to those questions related to chronic cough and wheeze as defined by the authors of the questionnaire.<sup>17</sup> A recent history of upper respiratory infection was defined by an affirmative parental response to the question, "Has your child had a cold in the past 6 weeks?"<sup>18</sup>

During their stay in the operating suite, urine samples were obtained from each child and frozen at -20°C until transportation to the laboratory for measurement of cotinine by radioimmunoassay. This method uses specific antisera produced in rabbits according to the method of Haley *et al.*<sup>19</sup> The inter- and intraassay variations are 9%, with a sensitivity of 2.0 ng/ml. Urinary concentration of creatinine was measured by calorimetric assay (Ectochem 500; Eastman Kodak, Rochester, NY). To account for differences in concentrations in urine among patients, concentrations of cotinine were corrected to the mean urinary concentration of creatinine of our patients using a previously published regression coefficient<sup>4,20</sup> between urinary concentrations of cotinine and creatinine. The values for cotinine were then standardized to the mean urinary concentration of creatinine of our patients.

### Anesthetic Protocol

Anesthetic care was provided by 12 attending anesthesiologists whose practices were limited to children and residents in anesthesiology. Each physician furnished a four-digit code number, which provided ano-

\*\* Vital and Health Statistics: National Hospital Discharge Survey: Annual Summary, 1992, Series 13; Data from the National Health Survey, No. 119. Washington, DC, US Department of Health and Human Services, Centers for Disease Control and Prevention/National Center for Health Statistics, DHSS Publication No. (PHS) 94-1779, 1992



nymity for tracking the effect of the anesthesiologist on airway complications.

After determining the oxygen saturation of hemoglobin by pulse oximetry ( $\text{SpO}_2$ ) while breathing room air, anesthesia was induced by inhalation of 70% nitrous oxide in oxygen and gradually increasing concentrations of halothane without any premedication. Patients who required neuromuscular blockade received vecuronium bromide (0.1 mg/kg). Anesthesia was maintained with 65% nitrous oxide in oxygen and a concentration of halothane that allowed proper surgical conditions with the lowest variance of heart rate and blood pressure. Patients were anesthetized using a face mask only when appropriate (*i.e.*, acceptable surgical site and duration, absence of aspiration hazard). All other patients (428 of 499) were anesthetized using an endotracheal tube. One hundred six of 499 patients received intravenous fentanyl supplementation (dose range, 1.0–6.4  $\mu\text{g/kg}$ ; one patient received 7.9 and another 11.3  $\mu\text{g/kg}$ ). To provide for postoperative pain relief, 285 of 499 patients received caudal, ilioinguinal, penile, or local infiltration blocks, which were combined with the general anesthetic agent of the protocol. Patients who inadvertently received volatile anesthetic agents other than halothane, neuromuscular blocking agents other than vecuronium, narcotic agents other than fentanyl, atropine as an antisialagogue or for prevention of bradycardia, or any drugs known to release histamine were excluded because of a failure to adhere to the study protocol. No patients were excluded because of their clinical condition or an adverse event that may have occurred.

#### Outcome Measures

The patient's anesthesiologist, unaware of the history of exposure to environmental tobacco smoke (because obtaining a smoking history about parents or caregivers is not part of the routine preoperative history), and unaware of the concentration of cotinine, recorded the following adverse events on a separate data sheet: laryngospasm (characterized by an inability to ventilate the patient's lungs and requiring either administration of continuous positive pressure or a neuromuscular blocking agent to restore ventilation), auscultated wheezing, bronchospasm requiring treatment, airway pressure increased to higher than the baseline peak airway pressure, stridor, breath holding, severe coughing (defined as three or more paroxysms or at least one episode lasting  $>5$  s) on induction or emergence from anesthesia, excessive mucous production

requiring suctioning of the endotracheal tube, and oxygen desaturation to  $\text{SpO}_2 \leq 95\%$  with regular pulsation evident on the pulse oximeter. Whether a patient experienced one or more than one adverse event, that patient was only counted once in the adverse event category. If the patient's anesthesiologist marked the section on the data sheet indicating that the event was the result of a nonpatient-related mechanical problem (*e.g.*, endobronchial intubation, tracheal tube kinking), then it was not considered an adverse event.

In the recovery room, the patient's nurse, unaware of the patient's history of passive smoking or concentration of cotinine, recorded the occurrence of adverse events as previously defined and the inability to maintain an  $\text{SpO}_2$  of 97% after oxygen therapy was terminated when the child was fully awake.

#### Statistical Analysis

Correlations of covariates to urinary concentrations of cotinine and to the incidence of adverse events were made by *t* test, Pearson's correlation coefficient, or chi-square analysis. Wilcoxon's test for independent samples was used for the covariates of patient age and weight because of the nonnormality of these data. Because of the presence of extreme values for patient weight and duration of anesthesia, these values were log transformed to appear more normal before comparison *via* analysis of variance. Categories of variables for which there were not sufficient numbers of patients were collapsed into relevant categories or removed from analysis. The relation between questionnaire reports of smoking and urinary concentrations of cotinine was evaluated using Spearman's correlation because of the nonnormality of the data for these variables. Logistic regression models were fitted to determine the relation between urinary concentrations of cotinine and having one or more adverse respiratory events and to assess whether suspected risk factors modified the effect of urinary concentrations of cotinine on that relation. This effect modification was evaluated by testing the significance of a product term created from urinary concentrations of cotinine and the variable of interest. Linear trend testing for concentrations of cotinine involved testing the significance of a single variable for cotinine, coded with low, moderate, and high levels as a linear relation in the model. Confounding, the presence of an additional factor related to both the concentration of cotinine and the occurrence of adverse respiratory events that distorts their observed association, was eval-



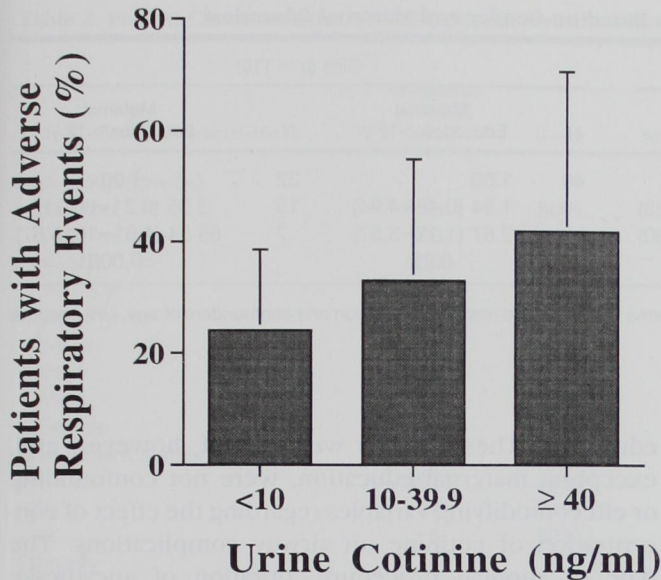

Fig. 1. Adverse respiratory events occurred in 18 of 43 (42%) children in whom the urinary concentration of cotinine was  $\geq 40$  ng/ml (odds ratio, 2.3; 95% CI, 1.2–4.5;  $P = 0.02$ ); in 30 of 91 (33%) of those with concentrations of cotinine between 10.0 and 39.9 ng/ml (odds ratio, 1.4; 95% CI, 0.9–2.4;  $P = 0.17$ ); and in 88 of 365 (24%) of those with a corrected concentration of cotinine  $< 10$  ng/ml.  $P = 0.01$  for the trend among the three cotinine groups.

uated by fitting regression models for the effect of urinary concentrations of cotinine on adverse respiratory events, with and without the potential confounder. Any variable that altered the coefficients for cotinine  $> 10\%$  was considered a confounder. When evaluating whether use of an endotracheal tube *versus* face mask modified the effect of urinary concentrations of cotinine, the event of mucous requiring suctioning of the endotracheal tube was removed from the analysis. Reported odds ratios are adjusted for age, presence of an endotracheal tube, upper respiratory infection, and reactive airways disease. All tests of statistical significance were two-sided and conducted with SAS software (version 6.10 for Windows; SAS Institute, Cary, NC). A probability value of 0.05 was used to define nominal statistical significance. No adjustments were made for multiple testing.

## Results

The proportion of patients experiencing adverse respiratory events increased with increasing urinary concentrations of cotinine (fig. 1). The number of adverse

events in those children who experienced them ranged from one to five. Seventeen percent of the 499 patients had one event, 6.4% had two events, and 3.7% had three to five events. In addition to the relation between concentrations of cotinine and airway complications, a relation was found between reported smoking and airway complications. Five hundred seventy-two parental surveys contained answers to questions concerning the quantity of smoke exposure. Those who reported exposure to at least one individual smoking  $\geq 30$  cigarettes per day had a 44.0% incidence of adverse events compared with a 25.5% incidence of airway complications in children reportedly not exposed to cigarette smoke. Questionnaire reports of smoke exposure correlated well ( $r = 0.46$ ,  $P = 0.0001$ ) with concentrations of cotinine (fig. 2). All concentrations of cotinine were lower than the range typical for active smokers.

Two risk factors were found to significantly modify the effect of concentration of cotinine on the incidence of adverse respiratory events (table 1). These were the gender of the child ( $P = 0.001$ ) and the educational level of the child's mother ( $P = 0.0008$ ). For girls, a concentration of cotinine  $\geq 40$  ng/ml was a risk factor for adverse respiratory events. For children whose

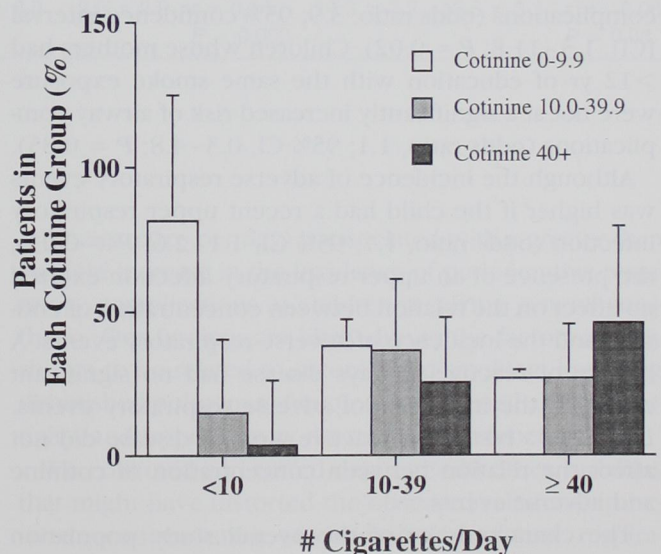

Fig. 2. For children whose reported total exposure to smoke was  $< 10$  cigarettes per day, 81.5% had urinary concentrations of cotinine  $< 10$  ng/ml. Similarly, more patients were found to have urine cotinine concentrations  $\geq 40$  ng/ml when parents reported that  $\geq 40$  cigarettes day were smoked near the child than if  $< 10$  per day were smoked (46.1% *vs.* 3.7%, respectively;  $r = 0.46$ ;  $P = 0.0001$ ).



**Table 1. Odds Ratios\* for One or More Adverse Respiratory Events Based on Gender and Maternal Education**

| Urinary Cotinine (mg/ml) | Boys (n = 384) |                           |    |                           | Girls (n = 115) |                           |    |                           |
|--------------------------|----------------|---------------------------|----|---------------------------|-----------------|---------------------------|----|---------------------------|
|                          | N              | Maternal Education >12 yr | N  | Maternal Education ≤12 yr | N               | Maternal Education >12 yr | N  | Maternal Education ≤12 yr |
| 0-9.9                    | 188            | 1.00                      | 96 | 1.00                      | 49              | 1.00                      | 32 | 1.00                      |
| 10-39.9                  | 37             | 0.84 (0.39-1.81)          | 30 | 1.92 (0.85-4.33)          | 9               | 1.54 (0.48-4.94)          | 15 | 3.55 (0.21-60.21)         |
| ≥40                      | 14             | 0.14 (0.02-1.22)          | 19 | 3.56 (1.29-9.80)          | 3               | 2.67 (1.12-3.57)          | 7  | 68.54 (4.61-1015.67)      |
| P trend                  |                | 0.08                      |    | 0.007                     |                 | 0.23                      |    | <0.0001                   |

\* Odds ratios were taken from combined logistic regression model of interaction terms of gender and maternal education and confounders of age, URI, reactive airways disease, and ETT use.

mothers had ≤12 yr of education, a concentration of cotinine ≥10 ng/ml was a strong risk factor for airway complications. Girls whose mothers had <12 yr of education showed the greatest risk. Boys whose mothers had >12 yr of education did not have an increased risk of adverse respiratory events. Regarding reported smoke exposure to at least one individual smoking ≥30 cigarettes per day, maternal educational level, but not gender, modified the effect of smoking on the incidence of respiratory complications ( $P = 0.04$ ). Children exposed to one individual smoking ≥30 cigarettes per day and whose mothers had ≤12 yr of education were more likely than nonexposed children to experience airway complications (odds ratio, 3.9; 95% confidence interval [CI], 1.3-11.8;  $P = 0.02$ ). Children whose mothers had >12 yr of education with the same smoke exposure were not at a significantly increased risk of airway complications (odds ratio, 1.1; 95% CI, 0.3-4.8;  $P = 0.85$ ).

Although the incidence of adverse respiratory events was higher if the child had a recent upper respiratory infection (odds ratio, 1.7; 95% CI, 1.1-2.6;  $P = 0.03$ ), the presence of an upper respiratory infection exerted no effect on the relation between concentration of cotinine and the incidence of adverse respiratory events. A history of reactive airways disease had no significant effect on the incidence of adverse respiratory events. Likewise, a history of reactive airways disease did not affect the relation between concentration of cotinine and adverse events.

The characteristics of the overall study population and of each of the three cotinine groups and the two adverse respiratory event groups (none *vs.* any) are shown in tables 2 and 3. The patients in the group with the highest concentrations of cotinine were younger, had the greatest percentage of African Americans, weighed less, and their parents had a lower level of

education. These factors were tested, however, and, excepting maternal education, were not confounding or effect-modifying variables regarding the effect of concentration of cotinine on airway complications. The type of surgical procedure, duration of anesthesia, mode of administration of anesthesia (endotracheal tube or face mask), American Society of Anesthesiologists patient status, and initial room air SpO<sub>2</sub> also were not confounding factors.

Additional factors (not shown in the tables) that also were considered and did not confound the relation between concentration of cotinine and adverse respiratory events include the attending anesthesiologist; the administration of regional/local blocks; the halothane and fentanyl doses; the home population density; the type of home cooking fuel; the household presence of dogs, cats, and birds as pets; and a history of prematurity, low birth weight, or a hospital stay beyond maternal discharge. Only three of the patients younger than 1 yr old were former premature/low-birth-weight babies. Although the type of primary home heating system was a factor by itself in the risk of adverse respiratory events, it did not affect the relation we found between concentration of cotinine and adverse respiratory events.

The proportion of patients in each cotinine group that experienced specific adverse events and the adjusted odds ratios for these events are given in table 4. The specific adverse events that were statistically significantly associated with high concentrations of cotinine were oxygen desaturation of hemoglobin in the operating room, breath holding, and severe coughing on induction of/emergence from anesthesia. Although not statistically significant, laryngospasm and severe coughing in the recovery room also were increased in the highest cotinine group. Of the 25 patients experiencing laryngospasm, 21 required only application of



## TOBACCO SMOKE IN ANESTHETIZED CHILDREN

**Table 2. Patient Characteristics of 499 Subjects, Stratified by Urinary Cotinine and Occurrence of Respiratory Events**

| Patient Characteristic                                         | All Patients<br>(n = 499)<br>(no.) | Cotinine (ng/ml) |            |            | P Value for<br>Trend      | Adverse Events |            |                           |
|----------------------------------------------------------------|------------------------------------|------------------|------------|------------|---------------------------|----------------|------------|---------------------------|
|                                                                |                                    | 0-9.9            | 10-39.9    | ≥40        |                           | None           | ≥1         | P Value                   |
| Age group (row %)                                              |                                    |                  |            |            |                           |                |            |                           |
| 1-6 mo                                                         | 45                                 | 80%              | 11%        | 8%         |                           | 80%            | 20%        |                           |
| 7-11 mo                                                        | 46                                 | 67%              | 15%        | 17%        |                           | 70%            | 30%        |                           |
| 1-3 yr                                                         | 106                                | 71%              | 19%        | 10%        |                           | 67%            | 33%        |                           |
| >3-5 yr                                                        | 107                                | 66%              | 24%        | 9%         |                           | 70%            | 30%        |                           |
| >5-8 yr                                                        | 115                                | 71%              | 22%        | 7%         |                           | 75%            | 25%        |                           |
| >8 yr                                                          | 80                                 | 88%              | 11%        | 1%         |                           | 79%            | 21%        |                           |
| Gender                                                         |                                    |                  |            |            |                           |                |            |                           |
| Male                                                           | 384                                | 74%              | 17%        | 9%         | 0.69                      | 77%            | 23%        | 0.34                      |
| Female                                                         | 115                                | 70%              | 21%        | 9%         |                           | 72%            | 28%        |                           |
| ASA patient status                                             |                                    |                  |            |            |                           |                |            |                           |
| I                                                              | 397                                | 74%              | 18%        | 8%         | 0.52                      | 71%            | 29%        | 0.15                      |
| II                                                             | 97                                 | 71%              | 20%        | 9%         |                           | 78%            | 22%        |                           |
| III                                                            | 5                                  | 60%              | 20%        | 20%        |                           | 80%            | 20%        |                           |
| Ethnicity                                                      |                                    |                  |            |            |                           |                |            |                           |
| White                                                          | 313                                | 79%              | 15%        | 6%         | 0.0001                    | 74%            | 26%        | 0.70                      |
| Black                                                          | 33                                 | 52%              | 24%        | 24%        |                           | 70%            | 30%        |                           |
| Hispanic                                                       | 124                                | 62%              | 26%        | 12%        |                           | 71%            | 29%        |                           |
| Other                                                          | 29                                 | 83%              | 14%        | 3%         |                           | 69%            | 21%        |                           |
| Median age (yr)                                                | 4                                  | 4                | 4          | 2          | 0.005                     | 4              | 3          | 0.27                      |
| Median weight (kg)                                             | 16.5                               | 17               | 16         | 14         | 0.006*                    | 17             | 16         | 0.08*                     |
| Father's education (mean no. of<br>years ± standard deviation) | 15.0 ± 3.6                         | 15.4 ± 3.7       | 14.4 ± 2.7 | 12.8 ± 3.3 | $r = 0.16$<br>$P = 0.002$ | 15.1 ± 3.6     | 14.9 ± 3.5 | $r = -0.03$<br>$P = 0.52$ |
| Mother's education (mean no. of<br>years ± standard deviation) | 14.1 ± 3.3                         | 14.4 ± 3.3       | 13.6 ± 3.0 | 12.5 ± 2.9 | $r = 0.14$<br>$P = 0.002$ | 14.3 ± 3.2     | 13.6 ± 3.3 | $r = -0.08$<br>$P = 0.08$ |

Percentages may not total 100% due to rounding to whole percentages.

\* Log transformed for analysis.

continuous positive pressure to restore ventilation, and 4 required neuromuscular blockade. Eleven of those 25 patients had accompanying oxygen desaturation of hemoglobin as previously defined. Because of the low frequency of occurrence, increased peak airway pressure higher than the patient's baseline ( $n = 0$ ), bronchospasm requiring treatment ( $n = 1$ ), auscultated wheezing ( $n = 3$ ), stridor ( $n = 6$ ), and recovery room desaturation after discontinuation of oxygen therapy ( $n = 8$ ) are not displayed in the table.

## Discussion

We have shown that exposure to environmental tobacco smoke as determined by urinary concentrations of cotinine  $\geq 40$  ng/ml (and by a history of exposure to

$\geq 30$  cigarettes per day) is associated with a greater than twofold increase in the incidence of perioperative respiratory complications in children receiving general anesthesia. Our findings are likely due to the factors already shown to be related to second-hand smoking, including diminished pulmonary function, heightened airway reactivity, and upper airway mucociliary dysfunction.

We collected and tested data on >20 other variables that might have distorted the observed relationship between concentration of cotinine and adverse respiratory events. Only two factors were found to have modified our results—female gender and socioeconomic status (as determined by maternal educational level). Girls had the greatest effect from a high concentration of cotinine. This gender difference has been well described in previous studies of passive smoking. Prior



Table 3. Surgical/Anesthetic Characteristics of 499 Subjects, Stratified by Urinary Cotinine and Occurrence of Adverse Events

| Surgical Site                                              | All Patients<br>(n = 499)<br>(no.) | Cotinine (ng/ml) |             |              | P Value<br>for Trend | Adverse Events |              | P Value |
|------------------------------------------------------------|------------------------------------|------------------|-------------|--------------|----------------------|----------------|--------------|---------|
|                                                            |                                    | 0-9.9            | 10-39.9     | ≥40          |                      | None           | ≥1           |         |
| Genitalia (hypospadias repair, circumcision, etc.)         | 139                                | 74%              | 16%         | 10%          | 0.40                 | 72%            | 28%          | 0.91    |
| Kidney and bladder (ureteral reimplant, pyeloplasty, etc.) | 46                                 | 83%              | 11%         | 6%           |                      | 72%            | 28%          |         |
| Peritoneum (hernia, etc.)                                  | 122                                | 71%              | 19%         | 9%           |                      | 73%            | 27%          |         |
| Ear (myringotomy with tubes, otoplasty, etc.)              | 28                                 | 64%              | 29%         | 7%           |                      | 64%            | 36%          |         |
| Nose and throat (tonsilectomy and adenoidectomy, etc.)     | 51                                 | 76%              | 20%         | 4%           |                      | 80%            | 20%          |         |
| Head and mouth (dental restorations, etc.)                 | 36                                 | 67%              | 14%         | 19%          |                      | 72%            | 28%          |         |
| Integument and superficial lymph nodes                     | 38                                 | 68%              | 26%         | 5%           |                      | 79%            | 21%          |         |
| Musculoskeletal                                            | 38                                 | 76%              | 18%         | 5%           |                      | 66%            | 34%          |         |
| Digestive                                                  | 1                                  | 0%               | 100%        | 0%           |                      | 100%           | 0%           |         |
| Mode of anesthesia administration                          |                                    |                  |             |              |                      |                |              |         |
| Endotracheal tube                                          | 428                                | 74%              | 18%         | 8%           | 0.82                 | 72%            | 28%          | 0.50    |
| Mask only                                                  | 71                                 | 70%              | 17%         | 13%          |                      | 76%            | 24%          |         |
| Mean anesthesia time (minutes ± standard deviation)        | 102.5 ± 64.7                       | 103.6 ± 68.9     | 94.3 ± 46.6 | 110.8 ± 60.2 | 0.38*                | 102.2 ± 76.6   | 102.6 ± 60.0 | 0.81*   |
| Mean SpO <sub>2</sub> in room air (% ± standard deviation) | 98.7 ± 1.3                         | 98.7 ± 1.3       | 98.7 ± 1.4  | 98.9 ± 1.5   | 0.66                 | 98.8 ± 1.3     | 98.7 ± 1.3   | 0.75    |

Percentages may not total 100% due to rounding to whole percentages.

\* Log transformed for analysis.

publications have concluded that females were more susceptible to the effects of passive smoking.<sup>21,22</sup> Such gender-based differences may be related to the greater ratio of airways to lung size<sup>22,23</sup> in the preadolescent female, which can therefore accommodate more airborne irritant.<sup>21</sup> There also may be greater cholinergic irritability in females.<sup>24</sup> Our study included many more boys than girls because of the high number of patients undergoing urologic procedures.

The current study also found that the educational level of the mother, an indicator of socioeconomic status, was an important factor in determining the effect of passive smoking on the risk of airway complications. For children whose mothers had a lower level of education, passive smoking was a strong risk factor for adverse respiratory events. Previous studies have shown

that infants of low socioeconomic status have a greater incidence of acute lower respiratory illness and that children in that group have a greater prevalence of chronic respiratory symptoms. This has been explained by factors related to the home environment, including crowding, stress, and a lower incidence of breast feeding.<sup>25</sup>

In evaluating the effect of passive smoking on specific adverse respiratory events, oxygen desaturation of hemoglobin, severe coughing on induction of/emergence from anesthesia, and breath holding were significantly associated with high or increasing concentrations of cotinine. Severe coughing in the recovery room and laryngospasm were also increased in passive smokers. The small numbers of patients with each individual event may create an issue of insufficient power to deter-







the cotinine value that patients would have had all the patients had the same urinary concentration of creatinine.

Several investigators have demonstrated increased airway complications in the presence of perioperative upper respiratory infections.<sup>30,31</sup> The current study confirmed these findings. Passive smokers with an upper respiratory infection, however, were at no greater risk than unexposed patients with an upper respiratory infection. The presence of an upper respiratory infection may be sufficiently potent to negate the effects of passive smoking. It is noteworthy that patients with a history of reactive airways disease were not at a significantly increased risk of adverse respiratory events. This may have been due to optimal preoperative preparation of the patients, including not anesthetizing children with active bronchospasm and appropriate intraoperative management. No synergism was found between a history of reactive airways disease and passive smoking on their effect on airway complications.

Children who are exposed to environmental tobacco smoke and who undergo general anesthesia have a greatly increased incidence of respiratory complications in the perioperative period. Additional studies are indicated to delineate the synergism between passive smoking and gender or lower levels of maternal education (as a measure of socioeconomic status) on the risk of airway complications.

This study adds to the considerable body of evidence<sup>1-13</sup> pointing to the public health risk posed by exposure to environmental tobacco smoke. Anesthesiologists, surgeons, pediatricians, and other health care professionals caring for children in the perioperative period should add this item to the preoperative medical history and regard its presence as a risk factor for respiratory complications. As the perioperative physician, the anesthesiologist has an important role in educating the parents of children scheduled for surgery using general anesthesia and the general public about the increased risk associated with exposure to environmental tobacco smoke.

The authors thank Drs. Ingrid Fitz-James, Amy Jonassen, Robert Kazim, Hoshang Khambatta, Joseph Morelli, Leila Pang, Peter Rothstein, William Schechter, Arthur Smerling, and Howard Zucker for their tireless cooperative efforts in adhering to the anesthetic protocol and reporting adverse respiratory events; Drs. Terry Hensle, Kevin Burbige, and John Schullinger and all the surgeons at The Babies and Children's Hospital of New York for their cooperation in patient enrollment and specimen retrieval; the residents in anesthesi-

ology at Columbia-Presbyterian Medical Center for their invaluable cooperation in data collection and protocol adherence; the nurses in The Babies and Children's Hospital of New York recovery room, ambulatory surgery unit, and operating room for their efforts in data and specimen collection; Mr. Stephen Colossimo of the American Health Foundation for assistance with cotinine analysis; Barbara Kol-ski and Micaela Cordoba for their aid with data collection and entry; and Drs. Margaret Wood, Mieczyslaw Finster, Robert Mellins, and Melissa Dowd-Begg for input and discussion related to the manuscript.

## References

1. Tager IB, Weiss ST, Munoz A, Rosner B, Speizer FE: Longitudinal study of the effects of maternal smoking on pulmonary function in children. *N Engl J Med* 1983; 309:699-703
2. Wang X, Wypij D, Gold DR, Speizer FE, Ware JH, Ferris BC Jr, Dockery DW: A longitudinal study of the effects of parental smoking on pulmonary function in children 6-18 years. *Am J Resp Crit Care Med* 1994; 149:1420-5
3. Berkey CS, Ware JM, Dockery DW, Ferris BG, Speizer FE: Indoor air pollution and pulmonary function growth in preadolescent children. *Am J Epidemiol* 1986; 123:250-60
4. Chilmarczyk BA, Salmun LM, Megathlin KN, Neveux LM, Palomaki GE, Knight GJ, Pulkkinen AJ, Haddow JE: Association between exposure to environmental tobacco smoke and exacerbations of asthma in children. *N Engl J Med* 1993; 328:1665-9
5. Murray AB, Morrison BJ: The effect of cigarette smoke from the mother on bronchial responsiveness and severity of symptoms in children with asthma. *J Allergy Clin Immunol* 1986; 77:575-81
6. Martinez FD, Cline M, Burrows B: Increased incidence of asthma in children of smoking mothers. *Pediatrics* 1992; 89:21-6
7. Weitzman M, Gortmaker S, Walker DK, Sobol A: Maternal smoking and childhood asthma. *Pediatrics* 1990; 85:505-11
8. Martinez FD, Wright AL, Taussig LM, Holberg CJ, Halonen M, Morgan WJ: Asthma and wheezing in the first six years of life. *N Engl J Med* 1995; 332:133-8
9. Wright AL, Holberg C, Martinez FD, Taussig LM, Group Health Medical Associates: Relationship of parental smoking to wheezing and nonwheezing lower respiratory tract illnesses in infancy. *J Pediatr* 1991; 118:207-14
10. Holberg CJ, Wright AL, Martinez FD, Morgan WJ, Taussig LM, Group Health Medical Associates: Child day care: Smoking by caregivers, and lower respiratory tract illness in the first 3 years of life. *Pediatrics* 1993; 91:885-92
11. Richardson MA: Upper airway complications of cigarette smoking. *J Allergy Clin Immunol* 1988; 81:1032-5
12. Etzel RA, Pattishall EN, Haley NJ, Fletcher RH, Henderson FW: Passive smoking and middle ear effusion among children in day care. *Pediatrics* 1992; 90:228-32
13. Boyle P: The hazards of passive- and active-smoking (editorial). *N Engl J Med* 1993; 328:1708-9
14. Greenberg RA, Haley NJ, Etzel RA, Loda FA: Measuring the exposure of infants to tobacco smoke: Nicotine and cotinine in urine and saliva. *N Engl J Med* 1984; 310:1075-8
15. Henderson FW, Reid HF, Morris R, Wang O, Hu PC, Helms RW, Forehand L, Mumford J, Lewtas J, Haley NJ, Hammond SK: Home



## TOBACCO SMOKE IN ANESTHETIZED CHILDREN

air nicotine levels and urinary cotinine excretion in preschool children. *Am Rev Respir Dis* 1989; 140:197-201

16. Axelrad CM, Sepkovic DW, Colosimo SG, Haley NJ: Biochemical validation of cigarette smoke exposure and tobacco use. *Short-term Bioassays in the Analysis of Complex Environmental Mixtures*. Edited by Sandhu SS, DeMarini DM, Mass MJ, Moore MM, Mumford JL. New York, V. Plenum, 1987, pp 115-26

17. Ferris BG: Recommended respiratory disease questionnaires for use with adults and children in epidemiological research. *Am Rev Respir Dis* 1978; 118(suppl):7-53

18. Empey DW, Laitinen LA, Jacobs L, Gold WM, Nadel JA: Mechanisms of bronchial hyper reactivity in normal subjects after upper respiratory infections. *Am Rev Resp Dis* 1976; 113:131

19. Haley NJ, Axelrad CM, Tilton KA: Validation of self-reported smoking behavior: Biochemical analyses of cotinine and thiocyanate. *Am J Public Health* 1983; 73:1204-7

20. Thompson SG, Barlow RD, Wald NJ, Van Vunakis H: How should urinary cotinine concentrations be adjusted for urinary creatinine concentration? *Clin Chim Acta* 1990; 187:289-96

21. Forastiere F, Agabiti N, Corbo GM, Pistelli R, Dell'orco V, Ciappi G, Perucci CA: Passive smoking as a determinant of bronchial responsiveness in children. *Am J Respir Crit Care Med* 1994; 149:365-7

22. Paoletti P, Carrozzi L, Viegi G, Modena P, Ballerin L, Pede FD, Grado L, Baldacci S, Pedreschi M, Vellutini M, Paggiaro P, Mammini U, Fabbri L, Guintini C: Distribution of bronchial responsiveness in a general population: Effect of sex, age, smoking and level of pulmonary function. *Am J Respir Crit Care Med* 1995; 151:1770-7

23. Schwartz J, Katz SA, Fegley RW, Tockman MS: Sex and race differences in the development of lung function. *Am Rev Respir Dis* 1988; 138:1415-21

24. Zamel N: Threshold of airway response to inhaled methacholine in healthy men and women. *J Appl Physiol* 1984; 56:129-32

25. Margolis PA, Greenberg RA, Keyes LL, LaVange LM, Chapman RS, Denny FW, Bauman KE, Boat BW: Lower respiratory illness in infants and low socioeconomic status. *Am J Public Health* 1992; 82:1119-26

26. Lakshmipathy N, Bokesch PM, Cowan DE, Lisan SR, Schmid CH: Environmental tobacco smoke: A risk factor for pediatric laryngospasm. *Anesth Analg* 1996; 82:724-7

27. Lyons B, Frizelle H, Kirby F, Casey W: The effect of passive smoking on the incidence of airway complications in children undergoing general anesthesia. *Anaesthesia* 1996; 82:324-6

28. Apseloff G, Ashton HM, Friedman H, Gerber N: The importance of measuring cotinine levels to identify smokers in clinical trials. *Clin Pharmacol Ther* 1994; 56:460-2

29. Reidenberg MM: Some smokers lie (editorial). *Clin Pharmacol Ther* 1994; 56:355

30. Cohen MM, Cameron CB: Should you cancel the operation when a child has an upper respiratory tract infection? *Anesth Analg* 1991; 72:282-8

31. DeSoto H, Patel RI, Soliman IE, Hannallah RS: Changes in oxygen saturation following general anesthesia in children with upper respiratory infection and symptoms undergoing otolaryngological procedures. *ANESTHESIOLOGY* 1988; 68:276-9
